# Supplementary material for: Enhancer-PRE communication contributes to the expansion of gene expression domains in proliferating primordia
Source: Oxford University Press journal article supplement (doi:10.1242/dev.065599), 2011-06-30
Supplement: dev065599tables1a.pdf [file dev065599tables1a.pdf]

**Table S1A. Variegation and pairing sensitive silencing**

| Reporter construct               | Number of variegated lines/<br>number of lines analyzed | Number of lines with pairing sensitive<br>silencing) number of variegated lines |
|----------------------------------|---------------------------------------------------------|---------------------------------------------------------------------------------|
| ABC-lacZ-P(w+)                   | 15/24                                                   | 6/15                                                                            |
| ABC -P(w+)-Casper                | 8/8                                                     | -                                                                               |
| ABC <sup>Mrt</sup> -lacZ-P(w+)   | 10/30                                                   | 8/10                                                                            |
| ABC <sup>Mrt</sup> -P(w+)-Casper | 23/24                                                   | -                                                                               |
| A-lacZ-P(w+)                     | 4/16                                                    | 3/4                                                                             |
| B-lacZ-P(w+)                     | 0/15                                                    | -                                                                               |
| C-lacZ-P(w+)                     | 0/12                                                    | -                                                                               |
| C <sup>Mrt</sup> -lacZ-P(w+)     | 0/11                                                    | -                                                                               |
| AB-lacZ-P(w+)                    | 7/17                                                    | 6/7                                                                             |
| BC-lacZ-P(w+)                    | 0/15                                                    | -                                                                               |
| BC <sup>Mrt</sup> -lacZ-P(w+)    | 0/11                                                    | -                                                                               |
| AC-lacZ-P(w+)                    | 4/8                                                     | 3/4                                                                             |
| AC <sup>Mrt</sup> -lacZ-P(w+)    | 3/8                                                     | 3/3                                                                             |
| iab-7-lacZ-P(w+)                 | 4/7                                                     | 2/4                                                                             |
| iab-7-BC-lacZ-P(w+)              | 7/13                                                    | 5/7                                                                             |
| vg-BE-P(w+)                      | 0/23                                                    | -                                                                               |
| vg-PRE-P(w+)                     | 9/17                                                    | 4/9                                                                             |
| vg-PRE-vg-BE-P(w+)               | 14/16                                                   | 7/14                                                                            |
| A-vg-BE-P(w+)                    | 4/9                                                     | -                                                                               |
