# Supplementary material for: Enhancer-PRE communication contributes to the expansion of gene expression domains in proliferating primordia
Source: Oxford University Press journal article supplement (doi:10.1242/dev.065599), 2011-06-30
Supplement: dev065599tables1b.pdf [file dev065599tables1b.pdf]

**Table S1B. Sequence and FlyBase coordinates of PCR primers**

| Oligonucleotide name | Oligonucleotide sequence (5'-3')      | FlyBase coordinates     |
|----------------------|---------------------------------------|-------------------------|
| Hh-3Kb-Top           | GGCGTCTCCGTCTGCTTTTAATTC              | chr3R:18970175-18970199 |
| Hh-3Kb-Bot           | ATACGAACCATTTTAGCTGCCATTA             | chr3R:18971010-18971034 |
| ModABC-Fwd           | ACACGCACACACACACTATCGCCTCGAGTTC       | chr3R:18967689-18967719 |
| ModABC-Rev           | TAAGTAATCTTGGGAAATATACATAAG           | chr3R:18972091-18972117 |
| ModA-Fwd             | GGAATTCACACGCACACACACACTATC           | chr3R:18967689-18967709 |
| ModA-Rev             | ATTTGCGGCCGCTTTAACTCTTTCTGTATT        | chr3R:18969631-18969650 |
| ModB-Fwd             | GGAATTCATATATGATCAACGAAAAG            | chr3R:18969924-18969943 |
| ModB-Rev             | ATTTGCGGCCGCACATAAAATACTTGCAGCCA      | chr3R:18970560-18970579 |
| ModC-Fwd             | GGGTACCAAGTCTTTGTTTGGCTGC             | chr3R:18970798-18970817 |
| ModC-Rev             | TTGCGGCCGCTTAATTTTTTTTCCATCGA         | chr3R:18971929-18971949 |
| ModAC-Fwd            | ATTTGCGGCCGAAGTCTTTGTTTGGCTGC         | chr3R:18970798-18970817 |
| ModAC-Rev            | TTGGATCCTAATTTTTTTTCCATCGA            | chr3R:18971929-18971949 |
| iab7-Fwd             | GATGCTATCGCGTTCGATTGT                 | chr2R:12726584-12726604 |
| iab7-Rev             | CGAGTTTCGGTCGCTGACGTC                 | chr2R:12725498-12725518 |
| vgBE-Fwd             | GGGCAACGCGGCCGCGAATTCGCAACTCAATGTTGG  | chr2R:8776380-8776401   |
| vgBE-Rev             | CTTTGGGATCCGAATTCAGCTCCCTGGTTTATCTGC  | chr2R:877109-8777133    |
| vgPRE-Fwd            | ATTTGGATCCCTATGTCGATTAATAATGTTGTAATGG | chr2R:8790970-8790996   |
| vgPRE-Rev            | TCATCAGGATCCGAACCTTGCAACCTTATGCC      | chr2R:8793522-8793542   |
| Lambda-Fwd           | ATAAGACTAGCGCCGCATGAAATAAGAGTAGCC     |                         |
| Lambda-Rev           | ATAAGAATGCGGCCGCTAGCAACTGGAATCATT     |                         |
